# Supplementary material
Source: Springer Nature journal article supplement (https://www.springermedizin.de/resource/supplementary/13601_2013_804_MOESM1_ESM.pdf/9678652)

(3 data points are outside the axis limits)

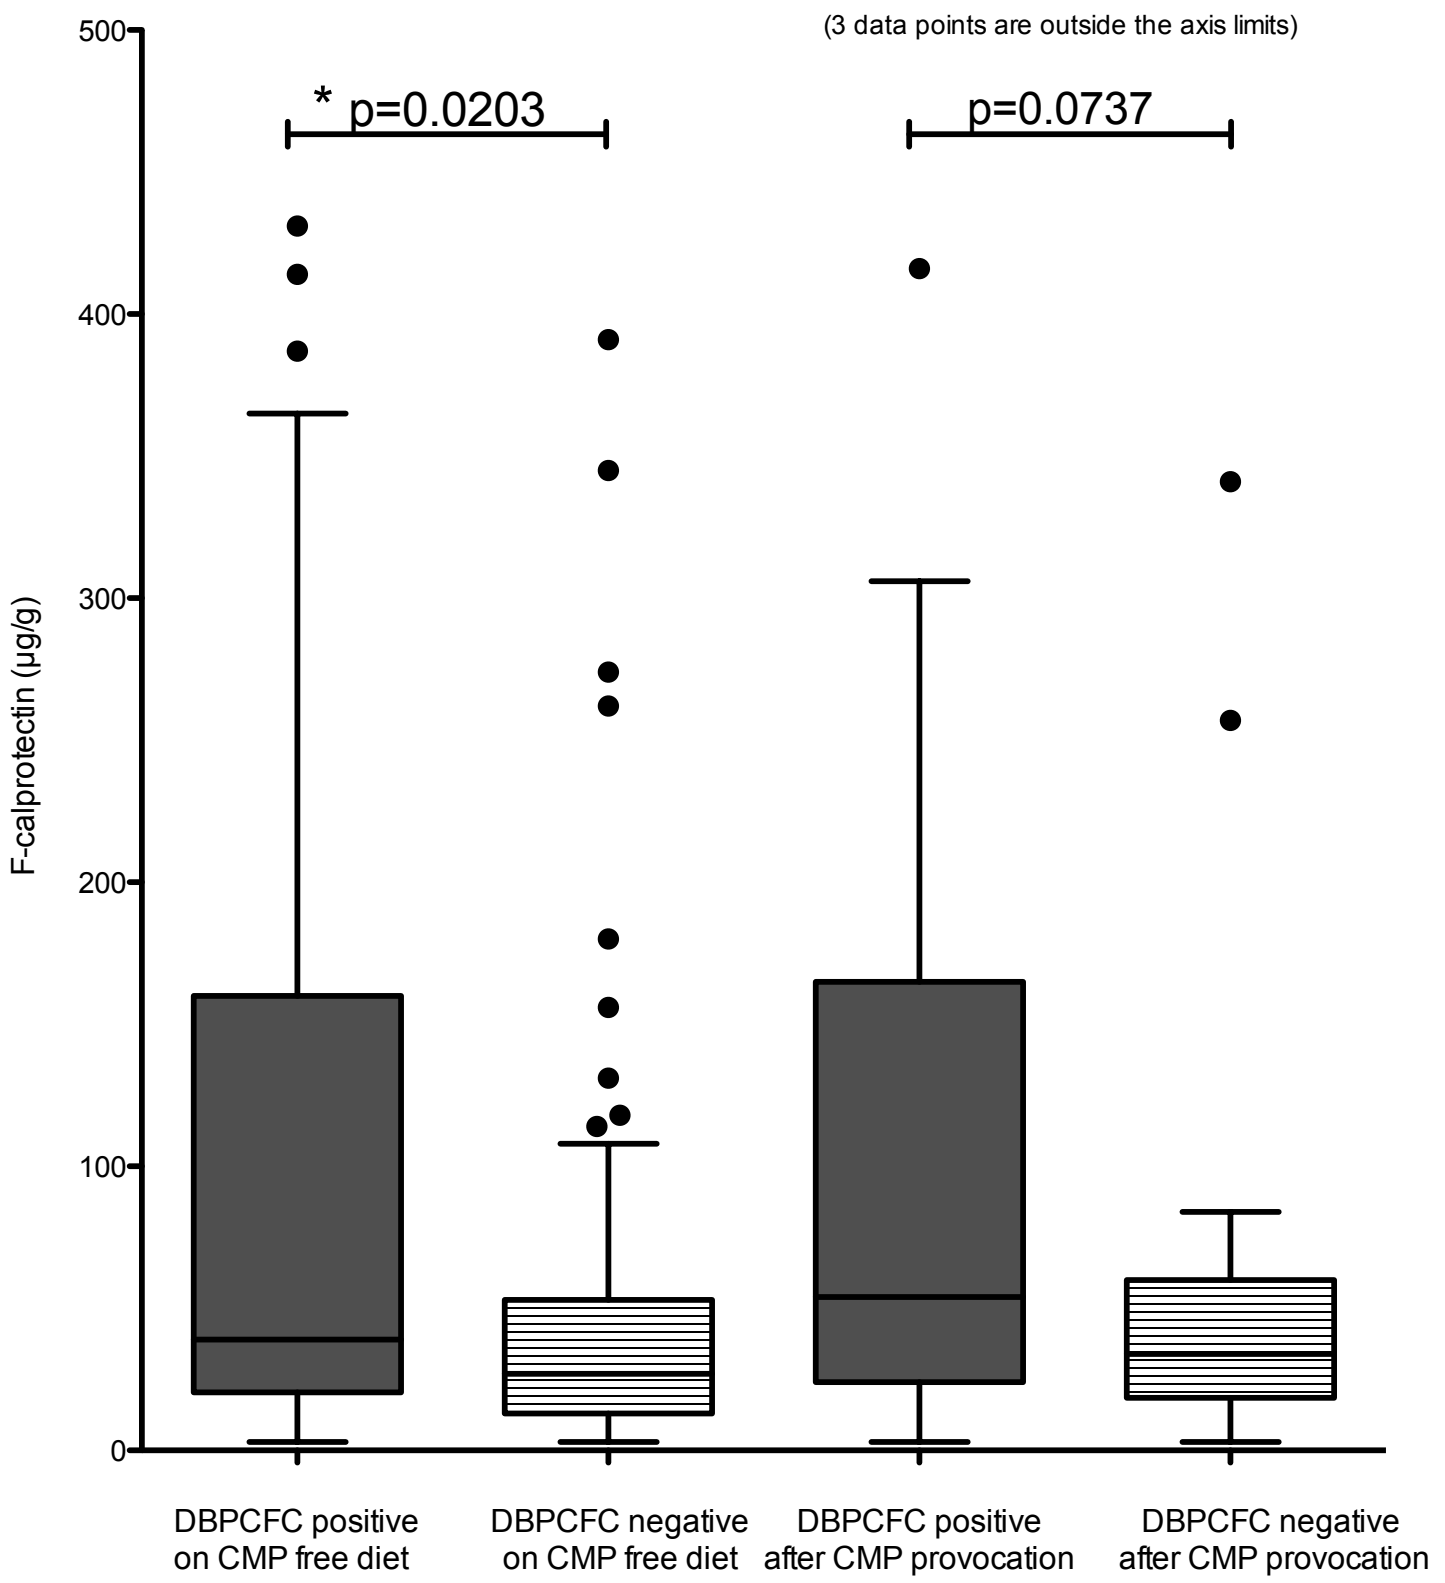

Supplement: MOESM1 [file 9678652]
